# Supplementary material for: Review: Influence of the CYP450 Genetic Variation on the Treatment of Psychotic Disorders
Source: MDPI journal article supplement (doi:10.3390/jcm10184275), 2021-09-21
Supplement: s1 [file s1]

Table S1: Study Design Summary

| Ref.                        | n   | Health Status                                                        | Gene(s)           | SNP(s)                                                  | Gender Distribution | Age (y)             | Smokers | Race                       | Antipsychotic | Daily Dose (mg/d) | Biometric Measures | Plasma Levels | Adverse Effects Tests/ Psychopathologic Status Test | DN A Analysis                   |
|-----------------------------|-----|----------------------------------------------------------------------|-------------------|---------------------------------------------------------|---------------------|---------------------|---------|----------------------------|---------------|-------------------|--------------------|---------------|-----------------------------------------------------|---------------------------------|
| <i>Laik a et al., 2009</i>  | 73  | Psychotic Disorder/<br>Mood Disorder/<br>Other Psychiatric Disorders | CYP1A2            | 1A2: rs762551                                           | 37F/36M             | 41.7 ± 14.7 (19-76) | 30      | Caucassian                 | Olanzapine    | 2.5-30 mg/d       | BMI                | LC/MS-MS      | DOTES/PDS/CGI1/CGI2                                 | RFLP                            |
| <i>Kang et al., 2009</i>    | 64  | Schizophrenia                                                        | CYP2D6/<br>CYP3A5 | CYP2D6: rs1065852, whole-gene deletion/CYP3A4: rs776746 | 23F/41M             | 48.9 ± 3.9          | -       | Asian (Korean)             | Risperidone   | 5.3 (2 - 16) mg/d | -                  | HP LC/EC D    | -                                                   | allele specific PCR/ld-PCR/RFLP |
| <i>Du et al., 2009</i>      | 130 | Schizophrenia (Drug Naive)                                           | CYP3A4            | CYP3A4: rs4986907, rs2242480                            | 85F/45M             | 36.07 ± 11.22       | -       | Asian (Han Chinese)        | Risperidone   | 2 - 6 mg/d        | -                  | HP LC/UV      | PANS S                                              | allele specific PCR             |
| <i>Consoli et al., 2009</i> | 60  | Psychotic Disorder                                                   | ABCB1             | ABCB1: rs1045642, rs2032582, rs1128503                  | 20F/40M             | 45.3 ± 15.3         | -       | Caucassian (Mediterranean) | Clozapine     | 165 ± 111 mg/d    | Body Weight        | HP LC/UV      | BPRSt 0/BPR St1                                     | RFLP                            |

|                               |     |                          |                                           |                                                                                                                                                                                                  |           |                            |     |                                               |              |                              |             |             |                                                    |                    |
|-------------------------------|-----|--------------------------|-------------------------------------------|--------------------------------------------------------------------------------------------------------------------------------------------------------------------------------------------------|-----------|----------------------------|-----|-----------------------------------------------|--------------|------------------------------|-------------|-------------|----------------------------------------------------|--------------------|
| <i>Nova Ibos et al., 2010</i> | 71  | Healthy                  | CYP2D6                                    | CYP2D6: rs35742686, rs3892097, rs5030655, rs5030867, rs5030656, whole-gene deletion                                                                                                              | 36F/35 M  | 23.6 +- 2.1F/23 .2 +- 2.7M | -   | Caucasian (Mediterranean)                     | Risperidone  | 1 mg*                        | BMI         | HP LC/MS-MS | -                                                  | RFLP/Id-PCR/rtPCR  |
| <i>Jovanovic et al., 2010</i> | 83  | Schizophrenia/Drug Naive | CYP2D6/ABCB1                              | CYP2D6: rs35742686, rs35742686, rs3892097, rs5030655, duplication, whole-gene deletion/ABCB1: rs2032582, rs1045642                                                                               | 66F/17 M  | 30.29 +- 8.1               | 45  | Caucasian (Croatian)                          | Risperidone  | 2.74 +- 1.6 mg/d             | Body Weight | HP LC/UV    | PANS S/EPS, Amenorrhea, Galactorrhea, Gynecomastia | RFLP/Id-PCR/rt-PCR |
| <i>Xiang et al., 2010</i>     | 23  | Healthy                  | CYP2D6/CYP3A5/ABCB1                       | *4, *5, *10, *14A/*3/C1236T, C3435T                                                                                                                                                              | 23M       | 36.5 +- 2.70 (31 - 39)     | -   | Asian (Han Chinese)                           | Risperidone  | 2 mg*                        | BP/BMI      | HP LC/MS-MS | -                                                  | RFLP               |
| <i>Balibey et al., 2011</i>   | 107 | Chronic Schizophrenia    | 1A2                                       | rs762551                                                                                                                                                                                         | 16F/81 M  | 18-60                      | 58  | Turk                                          | Clozapine    | 200-600 mg/d                 | -           | -           | BPRS/SANS/SAPS                                     | PCR                |
| <i>Suzuki et al., 2011</i>    | 63  | Schizophrenia            | 2D6                                       | rs1065852                                                                                                                                                                                        | 32F/31 M  | 39.4 +- 15.1               | 16  | Asian (Japanese)                              | Aripiprazole | 12 (n = 23)/24 (n = 40) mg/d | Body weight | LC/MS-MS    | -                                                  | rt-PCR             |
| <i>Biggs et al., 2011</i>     | 235 | Schizophrenia            | CYP1A2/CYP2D6/FMO3/CYP3A4, 3A5, 3A7, 3A43 | rs2472300, rs2069522, rs2069526, rs4646425, rs11631682/rs6002616, rs9306356/rs2213712, rs2859228, rs2859229, rs1492899, rs929087, rs10458360/rs2527894, rs2527887, rs4215, rs2525557, rs6960542, | 63F/17 2M | -                          | 150 | Caucasian (n = 161)/African American (n = 74) | Olanzapine   | 7.5 - 30 mg/d                | -           | HP LC/MS-MS | PANS S                                             | SNP Mass Array     |

|                                         |    |                                                                                                                                                      |                               |                                                                                                                                       |            |             |                                            |    |                     |                  |                                                       |                |                        |                                                                                            |                                   |  |  |
|-----------------------------------------|----|------------------------------------------------------------------------------------------------------------------------------------------------------|-------------------------------|---------------------------------------------------------------------------------------------------------------------------------------|------------|-------------|--------------------------------------------|----|---------------------|------------------|-------------------------------------------------------|----------------|------------------------|--------------------------------------------------------------------------------------------|-----------------------------------|--|--|
|                                         |    |                                                                                                                                                      |                               | rs4729562, rs651430, rs12535293, rs472660, rs17161981, rs17161983, rs2572023, rs2527927                                               |            |             |                                            |    |                     |                  |                                                       |                |                        |                                                                                            |                                   |  |  |
| <i>Suzu<br/>ki et<br/>al.,<br/>2012</i> | 64 | Schizophr<br>enia ( <i>n</i> =<br>61),<br>Unspecifi<br>ed<br>Psychotic<br>Disorder<br>( <i>n</i> = 2),<br>Delusiona<br>l Disorder<br>( <i>n</i> = 1) | CYP2D6                        | *10,<br>deletion                                                                                                                      | whole-gene | 31F/33<br>M | 35.5 +-<br>14.6<br>(18-65)                 | 25 | Asian(Japa<br>nese) | Risperid<br>one  | 4.6 +-<br>2.4<br>mg/d                                 | BMI            | HP<br>LC/<br>MS-<br>MS | -                                                                                          | rt-<br>PCR/<br>ld-<br>PCR         |  |  |
| <i>Naga<br/>i et<br/>al.,<br/>2012</i>  | 70 | Schizophr<br>enia                                                                                                                                    | CYP2D6                        | CYP2D6: *5 (whole-<br>gene deletion),<br>rs1065852, rs5030865.                                                                        |            | 34F/36<br>M | 38.2 +-<br>14.1F/3<br>9.2 +-<br>16.4M<br>y | x  | Asian<br>(Japanese) | Aripipra<br>zole | 12 ( <i>n</i> =<br>25), 24<br>( <i>n</i> =46)<br>mg/d | Bodyw<br>eight | -                      | Prolac<br>tin<br>Plasm<br>a<br>Levels<br>(Chem<br>ilumin<br>escene<br>immu<br>noassa<br>y) | PCR                               |  |  |
| <i>Yoo<br/>et al.,<br/>2012</i>         | 80 | Healthy                                                                                                                                              | CYP2D6/<br>ABCB1              | CYP2D6: rs1135840,<br>rs3892097, *5 (whole-<br>gene deletion),<br>rs1065852, rs5030865,<br>rs1058164, rs1135840.<br>ABCB1: rs1045642. |            | 80M         | 23.4 +-<br>2.1 (19-<br>30) y               | -  | Asian<br>(Korena)   | Risperid<br>one  | 2 mg/d                                                | BSA            | HP<br>LC/<br>UV        | -                                                                                          | PCR                               |  |  |
| <i>Lee<br/>et al.,<br/>2012</i>         | 96 | Schizophr<br>enia                                                                                                                                    | ABCB1/H<br>RH1/DRD<br>2-ANKK1 | rs7787082,<br>rs10248420/rs1306453<br>0/rs4938013                                                                                     |            | 36F/60<br>M | 32.5 +-<br>9.3                             | -  | Asian<br>(Korean)   | Clozapi<br>ne    | 319.0<br>+-<br>133.1<br>mg/d                          | -              | HP<br>LC/<br>MS-<br>MS | CGI-I                                                                                      | PCR-<br>MA<br>LDI<br>TOF/<br>Mass |  |  |

|                               |     |                                                         |                |                                                                                                                                                                                         |                       |                                                          |          |                                 |                          |                             |             |               |                                         |                       |       |
|-------------------------------|-----|---------------------------------------------------------|----------------|-----------------------------------------------------------------------------------------------------------------------------------------------------------------------------------------|-----------------------|----------------------------------------------------------|----------|---------------------------------|--------------------------|-----------------------------|-------------|---------------|-----------------------------------------|-----------------------|-------|
|                               |     |                                                         |                |                                                                                                                                                                                         |                       |                                                          |          |                                 |                          |                             |             |               |                                         |                       | Array |
| <i>Söderberg et al., 2013</i> | 342 | Psychiatric Patient                                     | CYP1A2/AHR     | CYP1A2: rs762551, rs2472304/AHR: rs4410790, rs4410790/CYP1A1: rs2470893, rs2472297.                                                                                                     | 161F/180M (1 Unknown) | 45 (16-89)                                               | 85F/109M | Caucasian                       | Olanzapine               | 10                          | -           | UP LC/MS-MS   | -                                       | SNP & SE Q            |       |
| <i>Almoguera et al., 2013</i> | 75  | Schizophrenia                                           | CYP2D6         | CYP2D6: rs35742686, rs3892097, rs5030655. CYP3A4: rs2740574, rs4646437, rs35599367. CYP3A5: rs776746. CYP3A7: rs45446698. ABCB1: rs2032582, rs9282564, rs2229109, rs1045642, rs1128503. | 34F/41M               | >40 ( $n = 25$ ), 40-59 ( $n = 39$ ), >= 60 ( $n = 11$ ) | -        | Caucasian (Mediterranean)       | Risperidone              | 3.5 - >9 mg/d               | BMI         | x             | PANS S (P/N/T), Length of Hospital Stay | rt-PCR                |       |
| <i>Herb ild et al., 2013</i>  | 207 | Pyschiatric Patient                                     | CYP2C19/CYP2D6 | CYP2C19: rs4244285, rs57081121. CYP2D6: rs35742686, rs3892097, *5(whole-gene deletion).                                                                                                 | 92F/115M              | 41.5 (19-73) y                                           | -        | Caucasian (Nordic-Scandinavian) | Various                  | -                           | -           | -             | Health Care Costs                       | rt-PCR                |       |
| <i>Hend set et al., 2013</i>  | 414 | Psychiatric Patient                                     | 2D6            | rs35742686, rs3892097, rs5030655, rs1065852, rs28371725, whole gene deletion                                                                                                            | -                     | 37 (8-89)/33 (10-86)                                     | -        | Caucasian                       | Risperidone/Aripiprazole | 3 (0.5-10)/15 (2.5-45) mg/d | -           | UH PL C/MS-MS | -                                       | rt-PCR                |       |
| <i>Suzuki et al., 2013</i>    | 74  | Schizophrenia                                           | ABCB1          | ABCB1: rs1045642, rs2032582. CYP2D6: *5 (whole-gene deletion), rs1065852.                                                                                                               | 36F/38M               | 37.5 ± 15.1 (18-65) y                                    | 28       | Asian (Japanese)                | Risperidone              | 4.7 ± 2.4 (mg/d)            | Body Weight | HP LC/MS      | BPRS (28.3 ± 9.0)                       | PCR                   |       |
| <i>Vikki et al., 2014</i>     | 187 | Schizophrenia/Schizophreniform disorder/Schizoaffective | CYP1A2         | CYP1A2: rs2470890.                                                                                                                                                                      | 70F/110M              | >18 (43.1 ± 11.0)                                        | 94T      | Caucasian (Finnish)             | Clozapine                | -                           | -           | HP LC/UV D    | LUNERS                                  | TaqMan SNP Genotyping |       |

|                                   |         | disorder/<br>Delusional disorder   |                             |                                                                                                                              |               |                                                       |    |                              |              |                                              |                            |                        |              | Assay            |
|-----------------------------------|---------|------------------------------------|-----------------------------|------------------------------------------------------------------------------------------------------------------------------|---------------|-------------------------------------------------------|----|------------------------------|--------------|----------------------------------------------|----------------------------|------------------------|--------------|------------------|
| <i>Van der Weide et al., 2014</i> | 23<br>8 | Psychotic Disorder                 | CYP3A4                      | CYP3A4: rs35599367.                                                                                                          | 150F/8<br>8M  | 71 (18 - 35<br>y)/100<br>(36 - 54<br>y)/67<br>(>55 y) | x  | x                            | Quetiapine   | 300<br>(12.5 - 1200)<br>mg/d                 | -                          | HP<br>LC/<br>UV        | Quetiapine   | rt-PCR           |
| <i>Suzuki et al., 2014</i>        | 89      | Schizophrenia                      | CYP2D6/<br>CYP3A5/<br>ABCB1 | CYP2D6: *5 (whole-gene deletion),<br>rs1065852, rs5030865.<br>CYP3A5: rs776746.<br>ABCB1: rs1045642,<br>rs2032582.           | 43F/46<br>M   | 37.94<br>+-<br>15.16 y                                | 10 | Asian<br>(Japanese)          | Aripiprazole | 12 (n = 33), 24<br>(n =56)<br>mg/d           | BMI                        | HP<br>LC/<br>MS        | -            | PCR              |
| <i>Kim et al., 2014</i>           | 40      | Healthy                            | CYP3A5/<br>ABCB1            | ABCB1: rs1128503,<br>rs2032582, rs1045642.<br>CYP3A5: rs776746.                                                              | 40M           | 23.8 +-<br>2.6 (19-<br>33) y                          | -  | Asian<br>(Korean)            | Quetiapine   | 100mg<br>/d                                  | BMI<br>(Height,<br>Weight) | HP<br>LC/<br>MS-<br>MS |              | Pyrosequencing   |
| <i>Czerwenky et al., 2015</i>     | 70      | Psychotic Disorder                 | CYP1A2                      | CYP1A2: rs762551,<br>rs35694136.                                                                                             | 54F/44<br>M   | 41.5 +-<br>14.6                                       | 40 | Caucasian                    | Olanzapine   | 14.7 +-<br>7.3<br>mg/d                       | BMI                        | HP<br>LC/<br>MS-<br>MS | -            | PCR              |
| <i>Ivanova et al., 2015</i>       | 31<br>9 | Schizophrenia/Schizotypal disorder | CYP1A2                      | CYP1A2: rs762551.                                                                                                            | 123F/1<br>96M | 43 +-<br>0.9                                          | -  | Caucasian                    | Various*     | 733.6 +-<br>40<br>(mg/day,<br>Clorpromazine) | -                          | -                      | AIMS<br>(TD) | rt-PCR           |
| <i>Cabaleiro et al., 2015</i>     | 70      | Healthy                            | CYP2D6                      | rs35742686,<br>rs1135824, rs3892097,<br>rs5030655, rs5030867,<br>rs5030656, rs1065852,<br>rs28371725, rs16947,<br>rs1135840, | 35F/35<br>M   | 28.2 +-<br>2.6 (25-<br>39)                            | -  | Caucasian<br>(Mediterranean) | Risperidone  | 1 mg/d                                       | -                          | HP<br>LC/<br>MS-<br>MS | -            | DN<br>A<br>Array |

|                                   |     |                                        |                       |                                                                                                                                                                                                                     |                          |                                      |   |                            |                                                                                                                         |                                       |     |               |             |                                  |
|-----------------------------------|-----|----------------------------------------|-----------------------|---------------------------------------------------------------------------------------------------------------------------------------------------------------------------------------------------------------------|--------------------------|--------------------------------------|---|----------------------------|-------------------------------------------------------------------------------------------------------------------------|---------------------------------------|-----|---------------|-------------|----------------------------------|
|                                   |     |                                        |                       | duplications, whole-<br>gene deletion                                                                                                                                                                               |                          |                                      |   |                            |                                                                                                                         |                                       |     |               |             |                                  |
| <i>Lisbeth et al., 2015</i>       | 82  | Psychiatric Patient                    | 2D6                   | rs1135840, rs773790593, rs5030656, rs1065852, rs28371706, rs16947, rs61736512, rs1058164, rs59421388, rs1135840, rs28371725, rs35742686, rs3892097, rs5030655, rs5030867, rs5030865, rs5030863, whole-gene deletion | 30F/52 M                 | 19 - 66                              | - | Caucassian                 | Aripiprazole/Haloperidol/Paliperidone/Risperidone/Zuclopenthixol                                                        | ¿?                                    | -   | UH PL C/MS-MS | -           | CYP2D6 genotyping commercial kit |
| <i>Van der Weide et al., 2015</i> | 834 | Psychotic Disorder                     | CYP2D6/CYP3A4         | CYP2D6: rs35742686, rs3892097, *5 (whole-gene deletion), rs5030655, rs5030656, rs1065852, rs28371725. CYP3A4: rs2740574.                                                                                            | 480F/354M                | 18 - 35                              | x | Caucasian (Nordic)         | Aripiprazole ( <i>n</i> = 130), Haloperidol ( <i>n</i> = 312), Pimozide ( <i>n</i> = 86), Risperidone ( <i>n</i> = 396) | -                                     | -   | HP LC/UV      | -           | PCR                              |
| <i>Brandl et al., 2015</i>        | 152 | Schizophrenia/Schizoaffective disorder | CYP3A4                | CYP3A4: rs680055, rs472660.                                                                                                                                                                                         | 55F (37/18)/97M (49/48)* | 34.9 ± 10.6 (35.3 ± 12.0/34.5 ± 8.5) | x | Caucasians                 | Various ( <i>n</i> = 86)/Clozapine ( <i>n</i> = 66)*                                                                    | -                                     | -   | x             | PANS S/BPRS | PCR                              |
| <i>Vandenbergh</i>                | 150 | Psychiatric Patient                    | CYP2D6/CYP3A4/CYP3A5/ |                                                                                                                                                                                                                     | 68F/82 M                 | 39                                   | x | Caucasian (122), Arab (4), | Risperidone                                                                                                             | <2 ( <i>n</i> = 68), 2.1-4 ( <i>n</i> | BMI | HP LC/MS      | PANS S/SAS  | rt-PCR                           |

|                               |     |                       |                                                                           |                                                                                                                                                                                                                                                                                                                                 |             |                                            |         |                                                                |            |                                                               |     |                 |                                                                         |      |
|-------------------------------|-----|-----------------------|---------------------------------------------------------------------------|---------------------------------------------------------------------------------------------------------------------------------------------------------------------------------------------------------------------------------------------------------------------------------------------------------------------------------|-------------|--------------------------------------------|---------|----------------------------------------------------------------|------------|---------------------------------------------------------------|-----|-----------------|-------------------------------------------------------------------------|------|
| <i>et al., 2015</i>           |     |                       | CYP3A7/<br>ABCB1                                                          |                                                                                                                                                                                                                                                                                                                                 |             |                                            |         | (3), African<br>(6), Other<br>(15)                             |            | = 65),<br>4.1-6 ( <i>n</i><br>= 13),<br>>6 ( <i>n</i> =<br>4) |     |                 |                                                                         |      |
| <i>Shilbayeh et al., 2015</i> | 34  | Healthy               | CYP3A5                                                                    | CYP3A5: rs776746.                                                                                                                                                                                                                                                                                                               | 34M         | 36 (19-46) y                               | 23      | Caucasian<br>(North-American)                                  | Quetiapine | 25 mg/d                                                       | BMI | HP LC/<br>MS-MS | -                                                                       | PCR  |
| <i>Cabaleiro et al., 2015</i> | 79  | Healthy               | CYP1A1/<br>CYP1A2/<br>CYP2C19/<br>CYP2C9/<br>CYP2D6/<br>CYP3A4/<br>CYP3A5 | CYP1A2: rs2069514,<br>rs762551. CYP2C19:<br>rs4244285,<br>rs28399504. CYP2C9:<br>rs1799853, rs1057910.<br>CYP2D6: rs1135840,<br>rs5030862,<br>rs28371706,<br>rs61736512, *40<br>[1863_1864ins(TTT<br>CGC CCC)2],<br>rs28371725,<br>rs28371725,<br>rs1058164, rs16947.<br>CYP3A4: rs2740574,<br>CYP3A5: rs776746,<br>rs10264272. | 31F/48<br>M | 23.80<br>+-<br>3.22F/2<br>3.40 +-<br>3.33M | -       | Caucasian<br>(Mediterranean)/Guat<br>emalan ( <i>n</i> =<br>2) | Quetiapine | -                                                             | BMI | -               | Prolactin<br>Plasma<br>Levels<br>,<br>Adverse<br>Effects<br>Questioning | PCR  |
| <i>Bakken et al., 2015</i>    | 289 | Psychotic<br>Disorder | CYP2D6/<br>CYP3A5/<br>ABCB1                                               | CYP2D6: rs35742686,<br>rs3892097, *5 (whole-<br>gene deletion),<br>rs5030655. CYP3A5:<br>rs28365083, rs776746.<br>ABCB1: rs1045642.                                                                                                                                                                                             | 161F/128M   | 38 (15-82) y                               | x       | Caucasian<br>(Central<br>European)                             | Quetiapine | 600<br>(25-2000)<br>mg/d                                      | -   | HP LC/<br>MS    | -                                                                       | PCR  |
| <i>Huang et al., 2016</i>     | 143 | Schizophrenia         | CYP1A2                                                                    | CYP1A2: rs762551.                                                                                                                                                                                                                                                                                                               | 56F/87<br>M | 25-83                                      | 10F/55M | Han<br>Chinese                                                 | Clozapine  | -                                                             | BMI | HP LC/<br>MS-MS | -                                                                       | RFLP |

|                              |     |                       |                                                    |                                                                                                                                        |           |                              |   |                           |                |                                       |                 |             |                |      |
|------------------------------|-----|-----------------------|----------------------------------------------------|----------------------------------------------------------------------------------------------------------------------------------------|-----------|------------------------------|---|---------------------------|----------------|---------------------------------------|-----------------|-------------|----------------|------|
| <i>Xu et al., 2016</i>       | 304 | Schizophrenia         | COMT/AKT1/CYP2C19                                  | rs737865/rs2494738/rs4986893                                                                                                           | 125F/179M | 39.9 +/- 16.4/37.6 +/- 14.5  | - | Asian (Han Chinese)       | Risperidone    | 2.1 +/- 1.2/2.3 +/- 1.6 mg/d          | -               | -           | PANS S         | PCR  |
| <i>Xu et al., 2016</i>       | 240 | Schizophrenia         | ABCB1/HTR2C/DRD3/TNFRK1/MT/TCF4/SLC6A2/SLC6A2/AKT1 | rs2032582, rs167771, rs3813929, rs4680, rs2242480, rs3001371, rs498177, rs2088885, rs4646316, rs9960767, rs5569,                       | 109F/131M | 42.1 +/- 12.9/41.7 +/- 12.5  | - | Asian (Han Chinese)       | Clozapine      | 122.0 +/- 69.2/122.2 +/- 69.2 mg/d    | -               | -           | PANS S         | PCR  |
| <i>Xu et al., 2016</i>       | 310 | Schizophrenia         | NOTCH4/DRD3/CYP2D6/COMT/MT/COMT/T/COMT/HTR2C       | rs3131296, rs1135840, rs5993883, rs1544325, rs1414334, rs6280, rs6269, rs4818,                                                         | 179F/131M | 43.51 +/- 17.8/43.4 +/- 18.4 | - | Asian (Han Chinese)       | Quetiapine     | 246.62 +/- 130.9/245.9 +/- 130.2 mg/d | -               | -           | PANS S         | PCR  |
| <i>Xu et al., 2016</i>       | 141 | Schizophrenia         | RELN/DRD3/AKT1/COMT/CYP2C19                        | rs7341475, rs2494732, rs174696, rs6280, rs6269, rs4986893                                                                              | 61F/80M   | 38.4 +/- 15.1/37.0 +/- 12.7  | - | Asian (Han Chinese)       | Chlorpromazine | 139.7 +/- 48.6/144.2 +/- 62.3 mg/d    | -               | -           | PANS S         | PCR  |
| <i>Kaur et al., 2017</i>     | 419 | Schizophrenia/Healthy | CYP2D6                                             | CYP2D6: rs3892097, rs106585.                                                                                                           | 157F/262M | 31.36                        | x | Asian (Indian)            | Risperidone    | -                                     | BMI, PR, BP, WC | HP LC-UV    | PANS S (P/N/T) | RFLP |
| <i>Belmonte et al., 2017</i> | 148 | Healthy               | CYP2D6/CYP3A4/CYP3A5/ABCB1                         | CYP2D6: rs35742686, rs3892097, *5 (whole-gene deletion), rs5030655, rs5030656. CYP3A4: rs67666821, rs2740574. CYP3A5: rs776746. ABCB1: | 63F/85M   | 18 - 55                      | x | Caucasian (Mediterranean) | Aripiprazole   | 10 (mg/d)                             | -               | HP LC-MS/MS | -              | PCR  |



|                                            |         |                                                       |                  |                                                                                                                      |               |                 |   |                                  |                  |                       |   |                        |           |            |  |  |
|--------------------------------------------|---------|-------------------------------------------------------|------------------|----------------------------------------------------------------------------------------------------------------------|---------------|-----------------|---|----------------------------------|------------------|-----------------------|---|------------------------|-----------|------------|--|--|
|                                            |         |                                                       |                  | rs1045642, rs1128503,<br>rs2032582.                                                                                  |               |                 |   |                                  |                  |                       |   |                        |           |            |  |  |
| <i>Papa<br/>zisis<br/>et al.,<br/>2018</i> | 10<br>4 | Schizophr<br>enia/Othe<br>r<br>Psychotic<br>Disorders | CYP2D6/<br>ABCB1 | CYP2D6: rs35742686,<br>rs3892097, *5 (whole-<br>gene deletion),<br>rs1065852. ABCB1:<br>rs2032582, rs1045642.        | 31F/70<br>M   | 42.6 +-<br>9.64 | - | Caucasian<br>(Mediterra<br>nean) | Various          | 943.1<br>+-<br>495.25 | - | HP<br>LC/<br>MS-<br>MS | PANS<br>S | rt-<br>PCR |  |  |
| <i>Jukic<br/>et al.,<br/>2019</i>          | 72<br>5 | -                                                     | CYP2D6           | rs35742686,<br>rs3892097, rs5030655,<br>rs5030656, rs1065852,<br>rs28371725,<br>duplication, whole-<br>gene deletion | 372F/3<br>53M | 42.8 +-<br>20.4 | - | Caucassian                       | Risperid<br>one  | 2.87 +-<br>1.65       | - | HP<br>LC/<br>MS-<br>MS | -         | rt-<br>PCR |  |  |
| <i>Jukic<br/>et al.,<br/>2019</i>          | 89<br>0 | -                                                     | CYP2D6           | rs35742686,<br>rs3892097, rs5030655,<br>rs5030656, rs1065852,<br>rs28371725,<br>duplication, whole-<br>gene deletion | 490F/4<br>00M | 37.8 +-<br>16.8 | - | Caucassian                       | Aripipra<br>zole | 14.45<br>+- 7.71      | - | HP<br>LC/<br>MS-<br>MS | -         | rt-<br>PCR |  |  |

HPLC: High-Performance Liquid Chromatography ; MS: Mass Spectrometry ; rt-PCR: real time-Polymerase Chain Reaction; PANSS: Positive and Negative Syndrome Scale; UV: UltraViolet (spectrophotometry); RFLP: Restriction Fragment Length Polymorphism ; LUNERS: Liverpool University Neuroleptic Side Effect Rating Scale. ; TOF: Time of Flight ; BMI: Body Mass Index; CGI: Clinical Global Impression; AIMS (TD): Abnormal Involuntary Movement Scale (tardive Dyskinesia); DOTES: Dosage Record Treatment Emergent Symptom Scale; PDS: Post-Traumatic stress Diagnostic Scale ; BPRS: Brief Psychiatric Rating Scale; SANS: Scale for the Assessment of Negative Symptoms; SAPS: Scale for the Assessment of Positive Symptoms.
